# Supplementary material for: Phosphorescent platinum(ii) complexes containing different β-diketonate ligands: synthesis, tunable excited-state properties, and their application in bioimaging
Source: Royal Society of Chemistry journal article supplement (doi:10.1039/c1jm10718f), 2011-01-01
Supplement: c1jm10718f.pdf [file c1jm10718f.pdf]

## Electronic Supplementary Information

# Phosphorescent platinum(II) complexes containing different $\beta$ -diketonate ligands: synthesis, tunable excited-state properties, and their application in bioimaging

Xin Mou,<sup>a</sup> Yongquan Wu,<sup>b</sup> Shujuan Liu,<sup>a</sup> Mei Shi,<sup>\*b</sup> Xiangmei Liu,<sup>a</sup> Chuanming Wang,<sup>c</sup> Shi Sun,<sup>a</sup> Qiang Zhao,<sup>\*a</sup> Xinhui Zhou,<sup>a</sup> and Wei Huang<sup>\*a</sup>

<sup>a</sup> Key Laboratory for Organic Electronics & Information Displays (KLOEID) and Institute of Advanced Materials (IAM), Nanjing University of Posts and Telecommunications, 210046 Nanjing, China.

E-mail: wei-huang@njupt.edu.cn and iamqzhao@njupt.edu.cn; Fax: 86-25-85866008

<sup>b</sup> Department of Chemistry, Fudan University, 200433 Shanghai, China.

E-mail: shimei@fudan.edu.cn; Fax: 86-21-55664185

<sup>c</sup> Shanghai Research Institute of Petrochemical Technology, SINOPEC, Shanghai 201208, China.

### Contents:

**Table S1** Crystallographic data for **4**

**Table S2** Coordination bonding parameters (Å, deg) observed in the Pt(II) complexes

### References

**Table S3** HOMOs and LUMOs distributions of **1-5** at the lowest singlet state

**Table S4** The singlet-state and triplet-state energy levels of different  $\beta$ -diketonate ligands

**Table S5** Absorption of **1-5** in CH<sub>2</sub>Cl<sub>2</sub> solution from TDDFT Calculations

**Fig. S1** Absorption (left) and emission (right) spectra of  $\beta$ -diketonate ligands at 298K in CH<sub>2</sub>Cl<sub>2</sub> solution.

**Fig. S2** Excitation spectra of [Pt(ppy)(CPNPD)] at 532 and 550 nm.

**Fig. S3** Calculated absorption spectra of **1-5** at room temperature in CH<sub>2</sub>Cl<sub>2</sub> solution.

**Fig. S4** Viability of KB cells with **1** (from left to right: 0, 3, 6.25, 12.5, 25, 50, 100 $\mu$ M).

**Fig. S5** Viability of KB cells with **2** (from left to right: 0, 3, 6.25, 12.5, 25, 50, 100 $\mu$ M).

**Fig. S6** Viability of KB cells with **3** (from left to right: 0, 3, 6.25, 12.5, 25, 50, 100 $\mu$ M).

**Fig. S7** Viability of KB cells with **4** (from left to right: 0, 3, 6.25, 12.5, 25, 50, 100 $\mu$ M).

**Fig. S8** Viability of KB cells with **5** (from left to right: 0, 3, 6.25, 12.5, 25, 50, 100 $\mu$ M).

**Table S1** Crystallographic data for **4**

|                                                                                        |                                                    |
|----------------------------------------------------------------------------------------|----------------------------------------------------|
| Compound reference                                                                     | Pt(ppy)(DBM) ( <b>4</b> )                          |
| Chemical formula                                                                       | C <sub>26</sub> H <sub>19</sub> NO <sub>2</sub> Pt |
| Formula Mass                                                                           | 572.51                                             |
| Crystal system                                                                         | Monoclinic                                         |
| <i>a</i> /Å                                                                            | 13.9545(14)                                        |
| <i>b</i> /Å                                                                            | 7.8076(8)                                          |
| <i>c</i> /Å                                                                            | 19.5196(19)                                        |
| $\alpha$ /°                                                                            | 90.00                                              |
| $\beta$ /°                                                                             | 109.6850(10)                                       |
| $\gamma$ /°                                                                            | 90.00                                              |
| Unit cell volume/Å <sup>3</sup>                                                        | 2002.4(3)                                          |
| Temperature/K                                                                          | 291(2)                                             |
| Space group                                                                            | <i>P</i> 21/ <i>c</i>                              |
| No. of formula units per unit cell, <i>Z</i>                                           | 4                                                  |
| Radiation type                                                                         | MoK $\alpha$                                       |
| Absorption coefficient, $\mu$ /mm <sup>-1</sup>                                        | 7.031                                              |
| No. of reflections measured                                                            | 9610                                               |
| No. of independent reflections                                                         | 3503                                               |
| <i>R</i> <sub>int</sub>                                                                | 0.1354                                             |
| Final <i>R</i> <sub><i>I</i></sub> values ( <i>I</i> > 2 $\sigma$ ( <i>I</i> ))        | 0.0435                                             |
| Final <i>wR</i> ( <i>F</i> <sup>2</sup> ) values ( <i>I</i> > 2 $\sigma$ ( <i>I</i> )) | 0.1018                                             |
| Final <i>R</i> <sub><i>I</i></sub> values (all data)                                   | 0.0520                                             |
| Final <i>wR</i> ( <i>F</i> <sup>2</sup> ) values (all data)                            | 0.1130                                             |
| Goodness of fit on <i>F</i> <sup>2</sup>                                               | 1.017                                              |
| CCDC number                                                                            | 758055                                             |

**Table S2** Coordination bonding parameters (Å, deg) observed in the Pt(II) complexes

| complex                                       | Pt-C     | Pt-N     | Pt-O     | C-Pt-N   | C-Pt-O    | N-Pt-O     | O-Pt-O    |
|-----------------------------------------------|----------|----------|----------|----------|-----------|------------|-----------|
| <b>4</b>                                      | 1.963(7) | 1.978(7) | 2.081(5) | 81.2(3)  | 174.5(2)  | 93.5(2)    | 90.71(19) |
|                                               |          |          | 2.014(5) |          | 94.6(2)   | 175.8(2)   |           |
| Pt(ppy) <sub>2</sub> <sup>1</sup>             | 1.984(4) | 2.125(3) |          | 112.8(2) |           |            |           |
| Pt(ppy-3-NO <sub>2</sub> )(acac) <sup>2</sup> | 1.965(4) | 1.990(3) | 2.089(3) | 81.6(16) | 175.1(14) | 93.6(13)   | 92.16(12) |
|                                               |          |          | 1.998(3) |          | 92.65(15) | 174.16(13) |           |
| Pt(ppy-4-tyryl-OMe)(acac) <sup>3</sup>        | 1.970(4) | 1.984(3) | 2.089(3) | 81.6(17) | 174.7(15) | 93.11(4)   | 91.60(13) |
|                                               |          |          | 2.000(3) |          | 93.69(16) | 175.28(13) |           |

## References

- (1) C. M. Laurent, Y. Z. Edgar, Alexander, *Inorg. Chem.*, 1984, **23**, 4249.
- (2) M. D. Perez, P. I. Djurovich, A. Hassan, G. Y. Cheng, T. J. Stewart, K. Aznavour R., Bau and M. E. Thompson, *Chem. Commun.*, 2009, 4215.
- (3) B. L. Yin, F. Niemeyer, J. A. Williams, J. Jiang, A. Boucekkinne, L. Toupet, B. H. Le and V. Guerchais, *Inorg. Chem.*, 2006, **45**, 8584.

**Table S3** HOMOs and LUMOs distributions of **1-5** at the lowest singlet state

| complexes | HOMO-1                                                                              | HOMO                                                                                | LUMO                                                                                | LUMO+1                                                                                |
|-----------|-------------------------------------------------------------------------------------|-------------------------------------------------------------------------------------|-------------------------------------------------------------------------------------|---------------------------------------------------------------------------------------|
| <b>1</b>  | 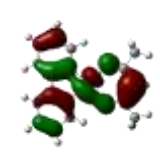   |    |    |    |
| <b>2</b>  |    |    |    |    |
| <b>3</b>  |    |    |    |    |
| <b>4</b>  |    |    |    |    |
| <b>5</b>  |  |  |  |  |

**Table S4** The singlet-state and triplet-state energy levels of different  $\beta$ -diketonate ligands

| ligands              | Hacac | HNDBM | HNPTPD       | HDBM  | HCPNPD       |
|----------------------|-------|-------|--------------|-------|--------------|
| $T_1/\text{cm}^{-1}$ | 22200 | 18520 | not measured | 19610 | not measured |
| $S_1/\text{cm}^{-1}$ | 32895 | 22272 | 21692        | 26042 | 22936        |

**Table S5** Absorption of **1-5** in  $\text{CH}_2\text{Cl}_2$  solution from TDDFT Calculations

| complex  | states | $\lambda$ (nm) | E (eV) | oscillator | main configurations (CI coeff) | assignment     |
|----------|--------|----------------|--------|------------|--------------------------------|----------------|
| <b>1</b> | S1     | 379            | 3.26   | 0.0555     | HOMO→LUMO (0.65)               | LC/MLCT        |
|          | S3     | 341            | 3.64   | 0.0839     | HOMO-1→LUMO (0.63)             | LC/MLCT/LLCT   |
| <b>2</b> | S1     | 399            | 3.10   | 0.4322     | HOMO→LUMO (0.66)               | MLCT/LLCT/ILCT |
|          | S2     | 389            | 3.18   | 0.2255     | HOMO→LUMO+1 (0.50)             | MLCT/ILCT/LLCT |
| <b>3</b> | S1     | 418.34         | 2.9637 | 0.5897     | HOMO→LUMO (0.67)               | ILCT/MLCT/LLCT |
|          | S4     | 376.50         | 3.2931 | 0.1130     | HOMO-1→LUMO+1 (0.50)           | LLCT/MLCT      |
| <b>4</b> | S2     | 380.41         | 3.2592 | 0.0789     | HOMO→LUMO+1 (0.64)             | MLCT/LLCT/LC   |
|          | S4     | 3.5157         | 352.66 | 0.2922     | HOMO-1→LUMO (0.60)             | MLCT/LLCT      |
| <b>5</b> | S1     | 408.67         | 3.0339 | 0.3898     | HOMO→LUMO (0.67)               | ILCT/MLCT      |
|          | S2     | 399.93         | 3.1002 | 0.0785     | HOMO-1→LUMO (0.67)             | LLCT/MLCT      |

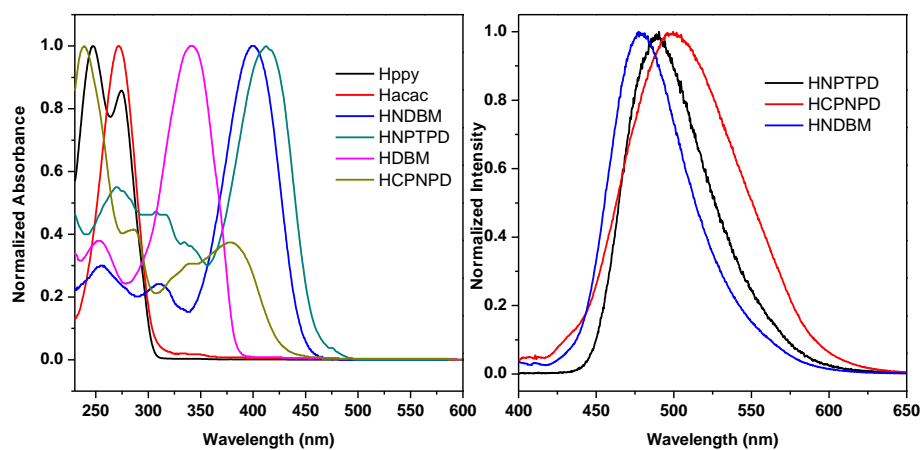

Fig. S1 Absorption (left) and emission (right) spectra of  $\beta$ -diketonate ligands at room temperature in  $\text{CH}_2\text{Cl}_2$  solution.

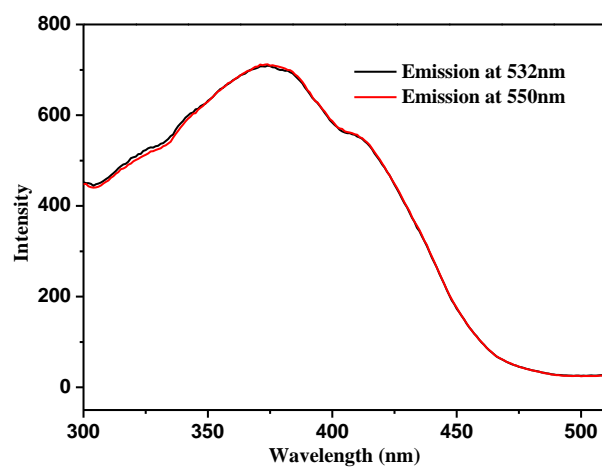

Fig. S2 Excitation spectra of [Pt(ppy)(CPNPD)] at 532 and 550 nm.

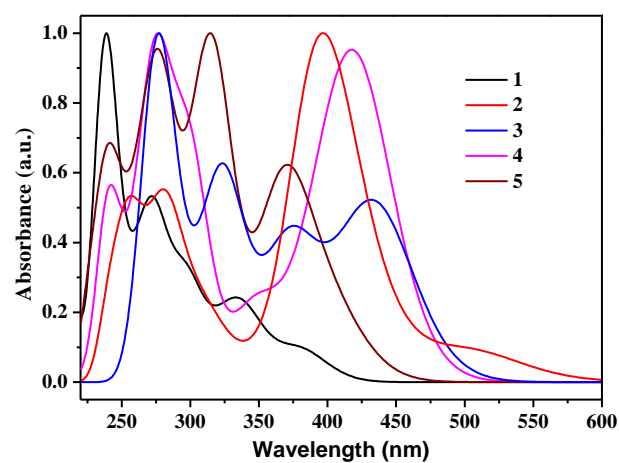

Fig. S3 Calculated absorption spectra of 1-5 at room temperature in  $\text{CH}_2\text{Cl}_2$  solution.

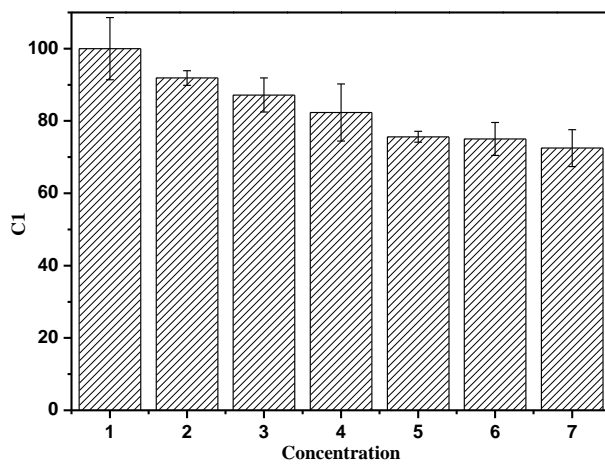

Fig. S4 Viability of KB cells with **1** (from left to right: 0, 3, 6.25, 12.5, 25, 50, 100 $\mu$ M).

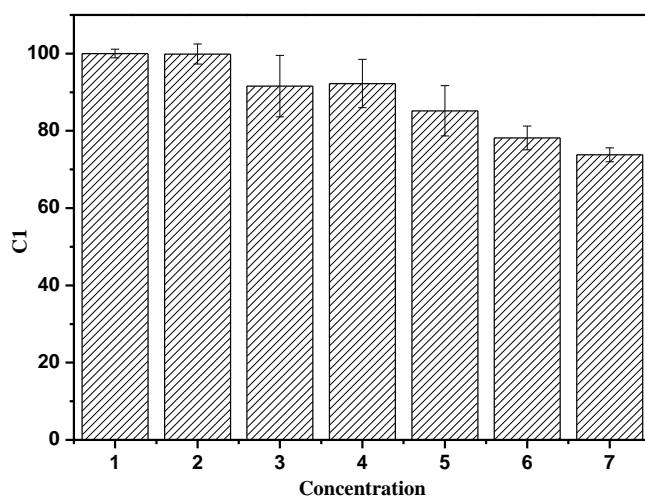

Fig. S5 Viability of KB cells with **2** (from left to right: 0, 3, 6.25, 12.5, 25, 50, 100 $\mu$ M).

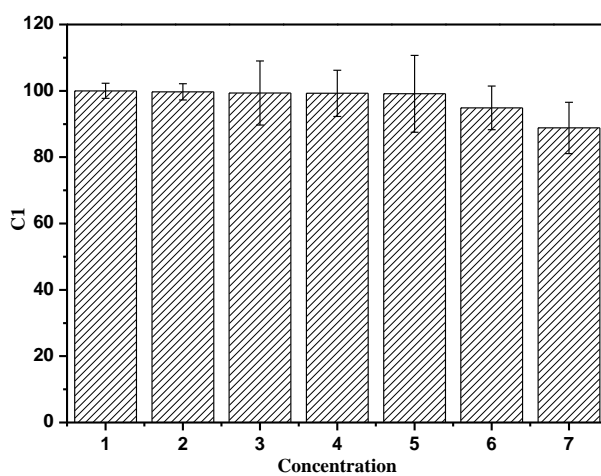

Fig. S6 Viability of KB cells with **3** (from left to right: 0, 3, 6.25, 12.5, 25, 50, 100 $\mu$ M).

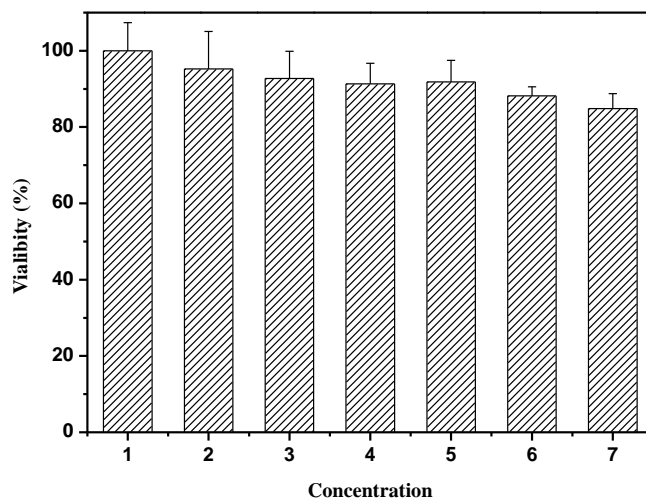

Fig. S7 Viability of KB cells with **4** at 37 °C for 24 h (from left to right: 0, 3, 6.25, 12.5, 25, 50, 100  $\mu$ M).

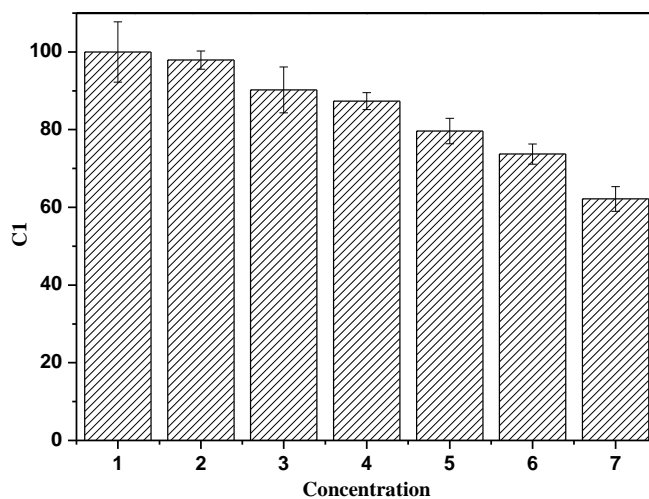

Fig. S8 Viability of KB cells with **5** (from left to right: 0, 3, 6.25, 12.5, 25, 50, 100 $\mu$ M).
